# Supplementary material for: Unravelling catalytic activity trends in ceria surfaces toward the oxygen reduction and water oxidation reactions
Source: Royal Society of Chemistry journal article supplement (doi:10.1039/d3re00027c), 2023-01-01
Supplement: d3re00027c1.pdf [file d3re00027c1.pdf]

## Unravelling Catalytic Trends of Ceria Surfaces for the Oxygen Reduction and Water Oxidation Reactions

Lanna E. B. Lucchetti<sup>(1)</sup>, Pedro A. S. Autreto<sup>(2)</sup>, James M. de Almeida<sup>(2,3)</sup>,

Mauro C. Santos<sup>(1)</sup>, Samira Siahrostami<sup>(4,\*)</sup>,

<sup>1</sup> *Laboratório de Eletroquímica e Materiais Nanoestruturados (LEMN) – Centro de Ciências Naturais e Humanas (CCNH), Universidade Federal do ABC (UFABC). Rua Santa Adélia 166, Bairro Bangu, 09210-170, Santo André - SP, Brazil.*

<sup>2</sup> *Centro de Ciências Naturais e Humanas (CCNH), Universidade Federal do ABC (UFABC). Rua Santa Adélia 166, Bairro Bangu, 09210-170, Santo André - SP, Brazil.*

<sup>3</sup> *Ilum, Centro Nacional de Pesquisa em Energia e Materiais (CNPEM). Rua Lauro Vannucci, 1020 - Fazenda Santa Cândida, Campinas - SP, 13087-548*

<sup>4</sup> *Department of Chemistry, University of Calgary, Calgary, Alberta, Canada*

Table S1: Adsorption free energies (eV) of oxygen reduction reaction intermediates on CeO<sub>2</sub> surfaces for  $U = 0$ .

| Surface-site | $\Delta G(*\text{OOH})$ | $\Delta G(*\text{O})$ | $\Delta G(*\text{OH})$ |
|--------------|-------------------------|-----------------------|------------------------|
| (100)        | 4.40                    | 3.31                  | 0.96                   |
| (111)        | 5.48                    | 2.85                  | 2.77                   |
| (110)        | 5.05                    | 4.54                  | 1.94                   |
| (221)-Ce1    | 5.09                    | 2.77                  | 2.20                   |
| (221)-Ce2    | 5.57                    | 2.91                  | 2.75                   |
| (221)-Ce3    | 5.46                    | 3.05                  | 2.94                   |
| (331)-Ce1    | 5.22                    | 2.77                  | 0.12                   |
| (331)-Ce2    | 5.60                    | 0.86                  | 0.78                   |

Table S2: Calculated free energies (eV) for the associative mechanism reaction steps for  $U = 0$ .

| Surface-site | $\Delta G_1$ | $\Delta G_2$ | $\Delta G_3$ | $\Delta G_4$ |
|--------------|--------------|--------------|--------------|--------------|
| (100)        | -0.52        | -1.10        | -2.35        | -0.96        |
| (111)        | 0.56         | -2.63        | -0.08        | -2.77        |
| (110)        | 0.13         | -0.50        | -2.60        | -1.94        |
| (221)-Ce1    | 0.17         | -2.37        | -0.52        | -2.20        |
| (221)-Ce2    | 0.65         | -2.66        | -0.16        | -2.75        |
| (221)-Ce3    | 0.54         | -2.41        | -0.11        | -2.94        |
| (331)-Ce1    | 0.30         | -2.45        | -2.65        | -0.12        |
| (331)-Ce2    | 0.68         | -4.74        | -0.08        | -0.78        |

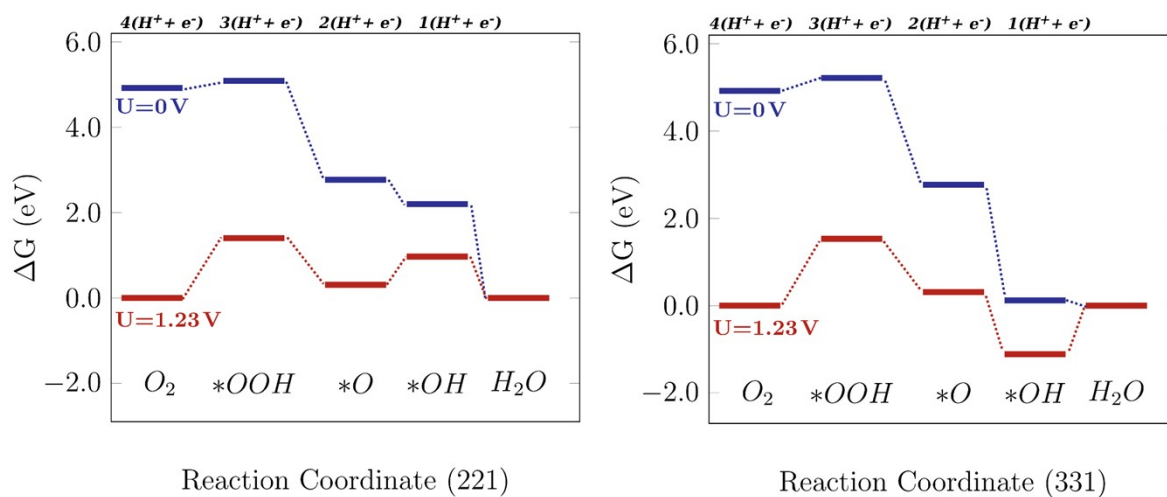

Figure S1: Free energy diagrams for the associative mechanism of the oxygen reduction reaction on stepped CeO<sub>2</sub> surfaces.

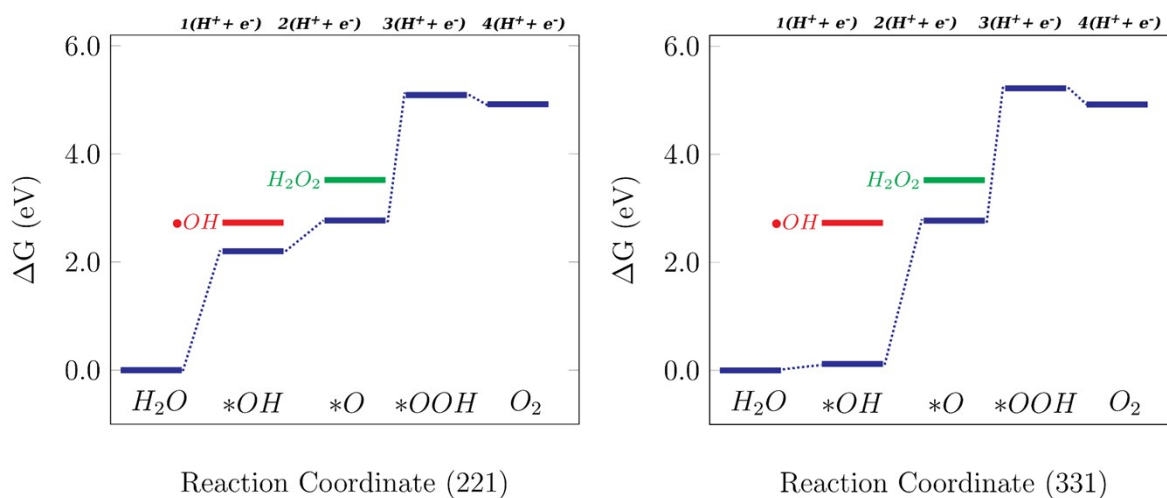

Figure S2: Free energy diagrams for the water oxidation reaction on stepped CeO<sub>2</sub> surfaces.

Table S3: Calculated formation energies for oxygen vacancy defects on surfaces (110) and (111), 1 and 2 indexes refer to the uppermost or second surface layer; oxygen reduction reaction free energies for  $U = 0$ .

| Surface  | Formation Energy (eV) | $\Delta G(*\text{OOH})$ | $\Delta G(*\text{O})$ | $\Delta G(*\text{OH})$ |
|----------|-----------------------|-------------------------|-----------------------|------------------------|
| (110)-V1 | 0.49                  | 4.52                    | 2.30                  | 1.11                   |
| (110)-V2 | 1.54                  | 3.65                    | 2.04                  | 0.11                   |
| (111)-V1 | 1.83                  | 2.91                    | 0.94                  | 0.06                   |
| (111)-V2 | 1.72                  | 4.35                    | 3.50                  | 1.79                   |

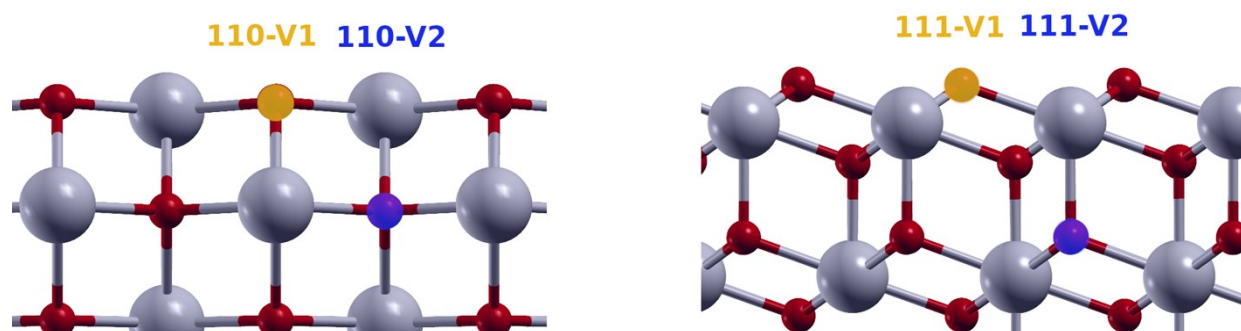

Figure S3: Schematic illustration of oxygen vacancies (V1 and V2) created in (110) and (111) CeO<sub>2</sub> surfaces.
